# Supplementary material for: LeView: automatic and interactive generation of 2D diagrams for biomacromolecule/ligand interactions
Source: Springer Nature journal article supplement (doi:10.1186/1758-2946-5-40), 2013-08-29

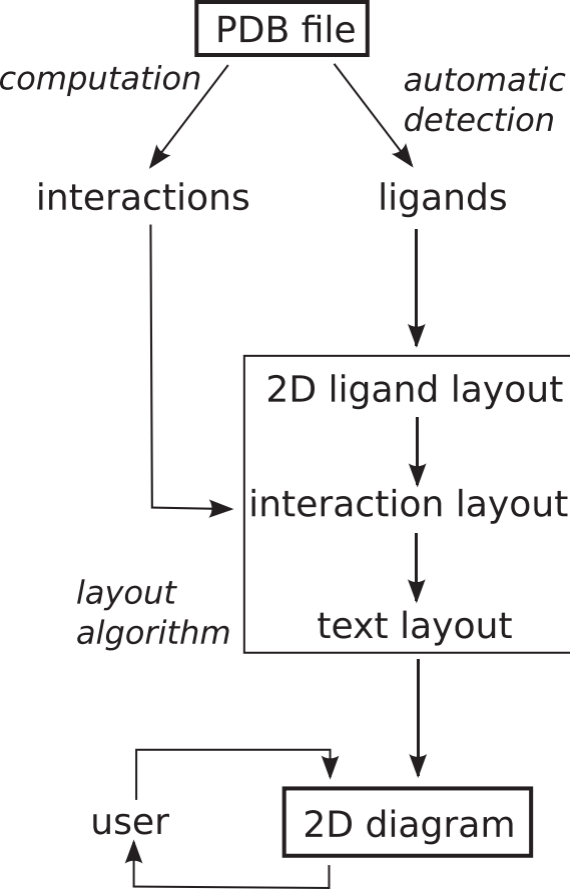

Supplement: 13321_2013_479_MOESM2_ESM.pdf [file 13321_2013_479_MOESM2_ESM.pdf]
